# Supplementary material for: Enhancement of Executive Functions but Not Memory by Multidomain Group Cognitive Training in Patients with Parkinson's Disease and Mild Cognitive Impairment: A Multicenter Randomized Controlled Trial
Source: Parkinsons Dis. 2020 Nov 30;2020:4068706. doi: 10.1155/2020/4068706 (PMC7721510; doi:10.1155/2020/4068706)
Supplement: Supplementary Materials — Supplementary Table 1: characteristics of the interventions. Supplementary Table 2: feasibility analysis: participation score, patients' satisfaction, and transfer to daily life. Table 3: CONSORT 2010 checklist of information to include when reporting a randomized trial. [file 4068706.f1.zip]

Archive with 3 entries (3 files):
- 4068706.f1/Supplementary Table 1_Interventions.docx
- 4068706.f1/Supplementary Table 2_Feasbility analysis.docx
- 4068706.f1/Supplementary Table 3_CONSORT 2010 Checklist.doc
